# Supplementary material for: The role of vulnerability factors in individuals with an at-risk mental state of psychosis
Source: Springer Nature journal article supplement (doi:10.1007/s40211-016-0179-9), 2016-03-01
Supplement: MOESM1 [file 14932276]

**Supplemental Online Table 1: Overview of imputeda and missing**b **data for each vulnerability factors**

|  | **HC**  (n=28) | | **ARMS-NT**  (n=96) | | **ARMS-T**  (n=31) | | **FEP**  (n=86) | | **Total**  (n=241) | |
| --- | --- | --- | --- | --- | --- | --- | --- | --- | --- | --- |
| **Vulnerability factor** | Imputed (%) | Missing (%) | Imputed (%) | Missing (%) | Imputed (%) | Missing (%) | Imputed (%) | Missing (%) | Imputed (%) | Missing (%) |
|  |  |  |  |  |  |  |  |  |  |  |
| School/educational difficulties | - | - | 4 (4.2%) | - | - | - | 3 (3.5%) | 2 (2.3%) | 7 (2.9%) | 2 (0.8%) |
| Employment difficulties | 11 (39.3%) | - | 32 (33.3%) | 1 (1.0%) | 9 (29.9%) | 1 (3.2%) | 20 (23.3%) | 2 (2.3%) | 72 (29.9%) | 4 (1.7%) |
| Marital status of being single | - | - | 6 (6.3%) | - | - | - | 4 (4.7%) | 2 (2.3%) | 10 (4.2%) | 2 (0.8%) |
| Relationship difficulties | - | - | 11 (11.5%) | - | 1 (3.2%) | 2 (6.5%) | 11 (12.8%) | 2 (2.3%) | 23 (9.5%) | 4 (1.7%) |
| Separated from parent during upbringing | - | - | 10 (10.4%) | 1 (1.0%) | 1 (3.2%) | - | 4 (4.7%) | 2 (2.3%) | 15 (6.2%) | 3 (1.2%) |
| Motor coordination difficulties | - | - | 8 (8.3%) | - | 2 (6.5%) | 2 (6.5%) | 3 (3.5%) | 2 (2.3%) | 13 (5.4%) | 4 (1.7%) |
| Lifetime drug use | - | - | 6 (6.25%) | - | - | - | 2 (2.3%) | - | 8 (3.3%) | - |
| Burdened with criticism | 4 (14.3%) | - | 23 (24.0%) | 1 (1.0%) | 5 (16.1%) | 2 (6.5%) | 20 (23.3%) | 2 (2.3%) | 52 (21.6%) | 5 (2.1%) |
| Burdened with conflicts | 4 (14.3%) | - | 12 (12.5%) | 1 (1.0%) | 3 (9.7%) | 2 (6.5%) | 14 (16.3%) | 2 (2.3%) | 33 (12.7%) | 5 (2.1%) |
| Burdened with positive feelings | 4 (14.3%) | - | 10 (10.4%) | 1 (1.0%) | 5 (16.1%) | 2 (6.5%) | 15 (17.4%) | 2 (2.3%) | 34 (14.1%) | 5 (2.1%) |
| Burdened with ambiguous situations | 4 (14.3%) | - | 10 (10.4%) | 1 (1.0%) | 5 (16.1%) | 2 (6.5%) | 12 (14.0%) | 2 (2.3%) | 31 (12.9%) | 5 (2.1%) |
| Burdened with noisy environment | 4 (14.3%) | - | 10 (10.4%) | 1 (1.0%) | 5 (16.1%) | 2 (6.5%) | 12 (14.0%) | 2 (2.3%) | 31 (12.9%) | 5 (2.1%) |
| Working under time pressure | 4 (14.3%) | - | 10 (10.4%) | 1 (1.0%) | 4 (12.9%) | 2 (6.5%) | 14 (16.3%) | 2 (2.3%) | 32 (13.3%) | 5 (2.1%) |

a Missing data was imputed if subject provided data for at least half of all other risk factors of interest

b Data was considered missing and was not imputed if subject provided data for less than half of all other risk factors of interest
